# Supplementary material for: iTRAQ-based quantitative analysis of age-specific variations in salivary proteome of caries-susceptible individuals
Source: PubMed Central journal article supplement (PMC6202833; doi:10.1186/s12967-018-1669-2), 2018-10-25

**Additional file 2: Table S1. Demographics and caries state of individual subject.**

| <b>Group</b> | <b>Sample No.</b> | <b>Age</b> | <b>Gender</b> | <b>DMFT</b> |
|--------------|-------------------|------------|---------------|-------------|
| ACF          | #1                | 20         | F             | 0           |
| ACF          | #2                | 21         | M             | 0           |
| ACF          | #3                | 20         | F             | 0           |
| ACF          | #4                | 20         | M             | 0           |
| ACF          | #5                | 19         | F             | 0           |
| ACF          | #6                | 20         | M             | 0           |
| ACF          | #7                | 20         | F             | 0           |
| ACF          | #8                | 20         | M             | 0           |
| ACF          | #9                | 21         | M             | 0           |
| ACF          | #10               | 20         | F             | 0           |
| ACS          | #11               | 20         | F             | 6           |
| ACS          | #12               | 24         | M             | 11          |
| ACS          | #13               | 21         | F             | 7           |
| ACS          | #14               | 20         | M             | 8           |
| ACS          | #15               | 20         | M             | 5           |
| ACS          | #16               | 20         | F             | 7           |
| ACS          | #17               | 21         | F             | 5           |
| ACS          | #18               | 20         | F             | 5           |
| ACS          | #19               | 22         | F             | 5           |
| ACS          | #20               | 21         | M             | 6           |
| ECF          | #21               | 62         | F             | 0           |
| ECF          | #22               | 83         | M             | 0           |
| ECF          | #23               | 83         | F             | 0           |
| ECF          | #24               | 83         | F             | 0           |
| ECF          | #25               | 79         | M             | 0           |
| ECF          | #26               | 86         | M             | 0           |
| ECF          | #27               | 81         | F             | 0           |
| ECF          | #28               | 82         | F             | 0           |
| ECF          | #29               | 83         | F             | 0           |
| ECF          | #30               | 87         | M             | 0           |
| ECS          | #31               | 78         | F             | 14          |
| ECS          | #32               | 77         | M             | 7           |
| ECS          | #33               | 86         | F             | 13          |
| ECS          | #34               | 81         | F             | 6           |
| ECS          | #35               | 86         | M             | 11          |
| ECS          | #36               | 89         | M             | 7           |
| ECS          | #37               | 88         | F             | 10          |
| ECS          | #38               | 86         | M             | 7           |
| ECS          | #39               | 89         | M             | 11          |
| ECS          | #40               | 86         | F             | 5           |

**Additional file 2: Figure S1. SDS-PAGE gel electrophoresis of proteins from different saliva samples.**

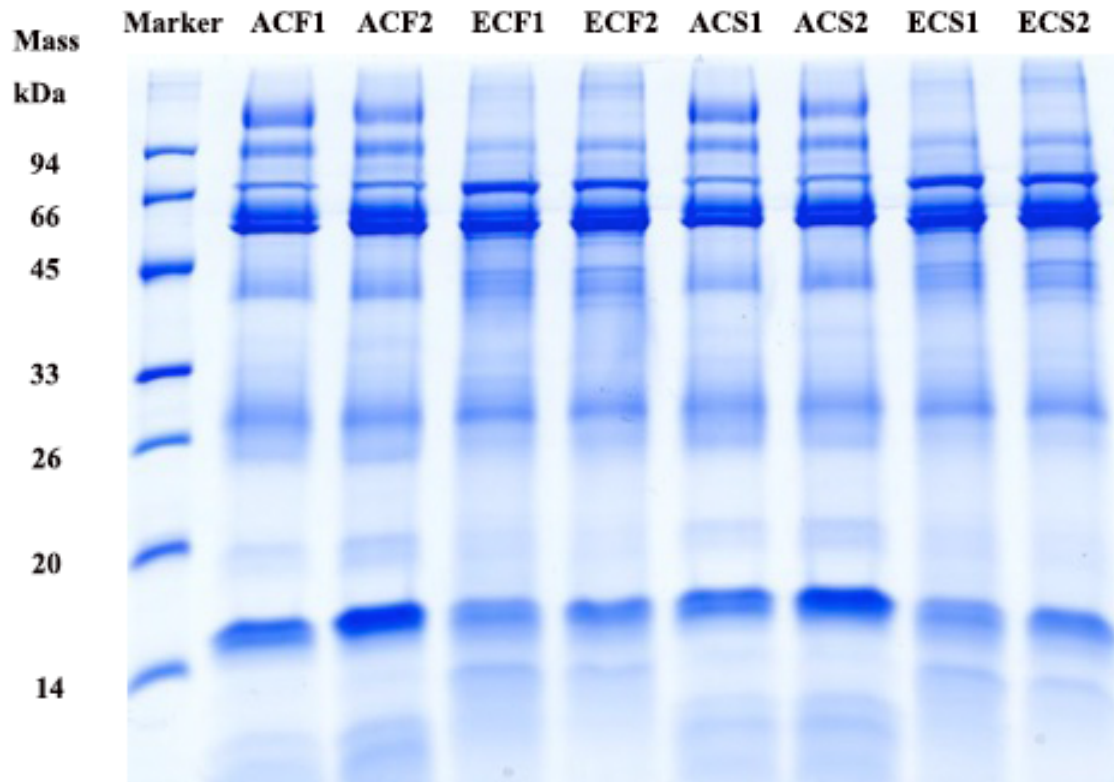

**Additional file 2: Figure S2. Correlation analysis of four experimental groups and their replicate in iTRAQ quantification.**

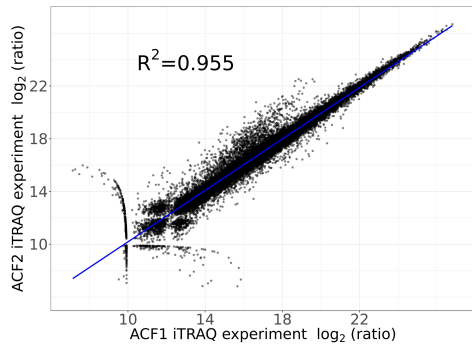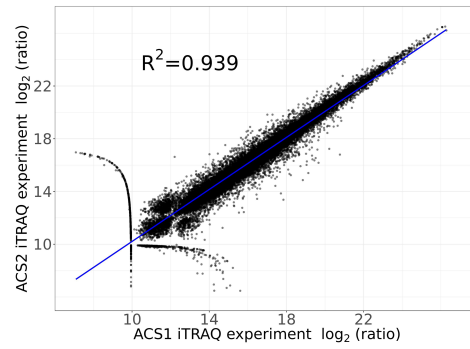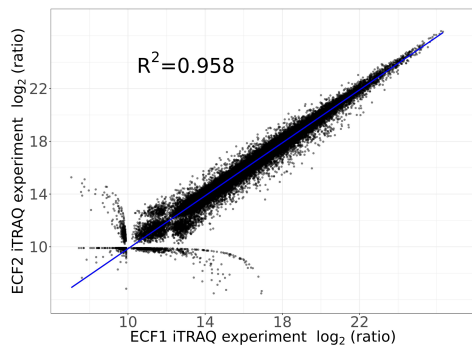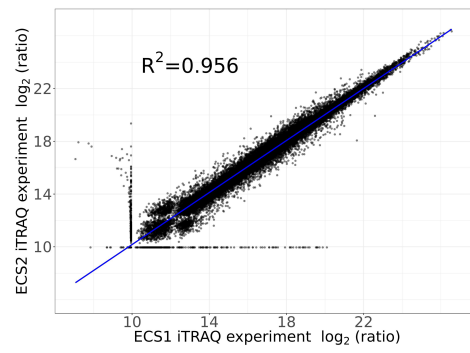

**Additional file 2: Figure S3. Comparison of the relative fold changes (log2 (ratios)) of the tag intensity for differential proteins identified exclusively in ACF vs ACS and ECF vs ECS.**

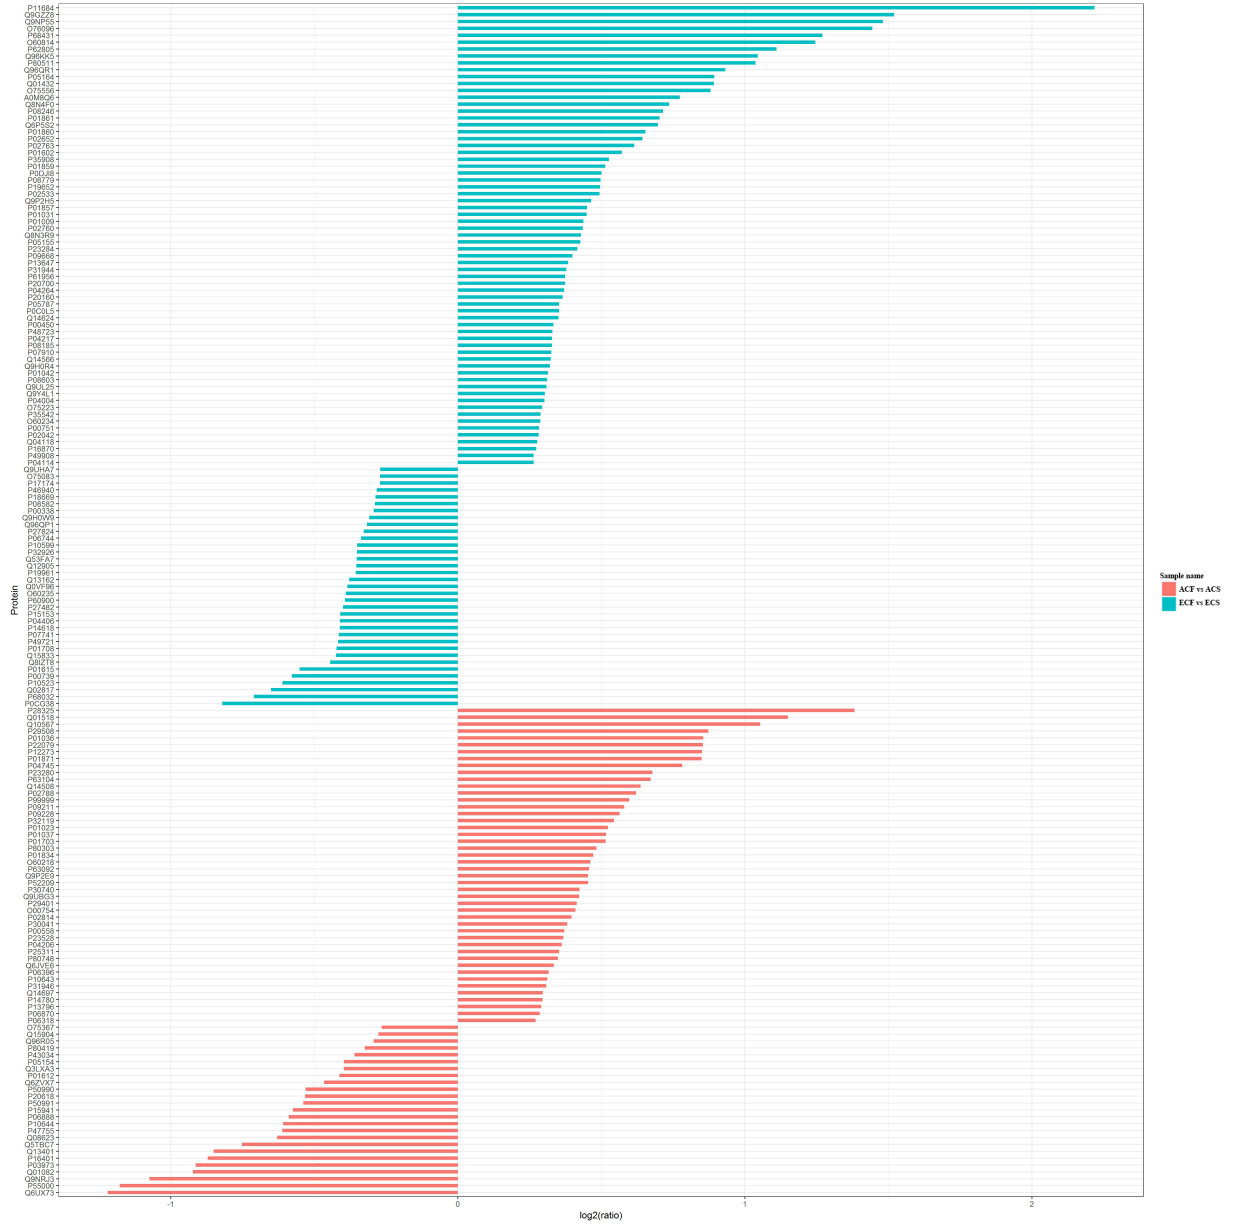



**Additional file 2: Figure S4. Hierarchical clustering analysis of differentially expressed proteins identified commonly in ACF vs ACS, ECF vs ECS, ACF vs ECF, and ACS vs ECS by iTRAQ based LC-MS/MS. Saliva samples are shown in the columns, and proteins are demonstrated in the rows.**

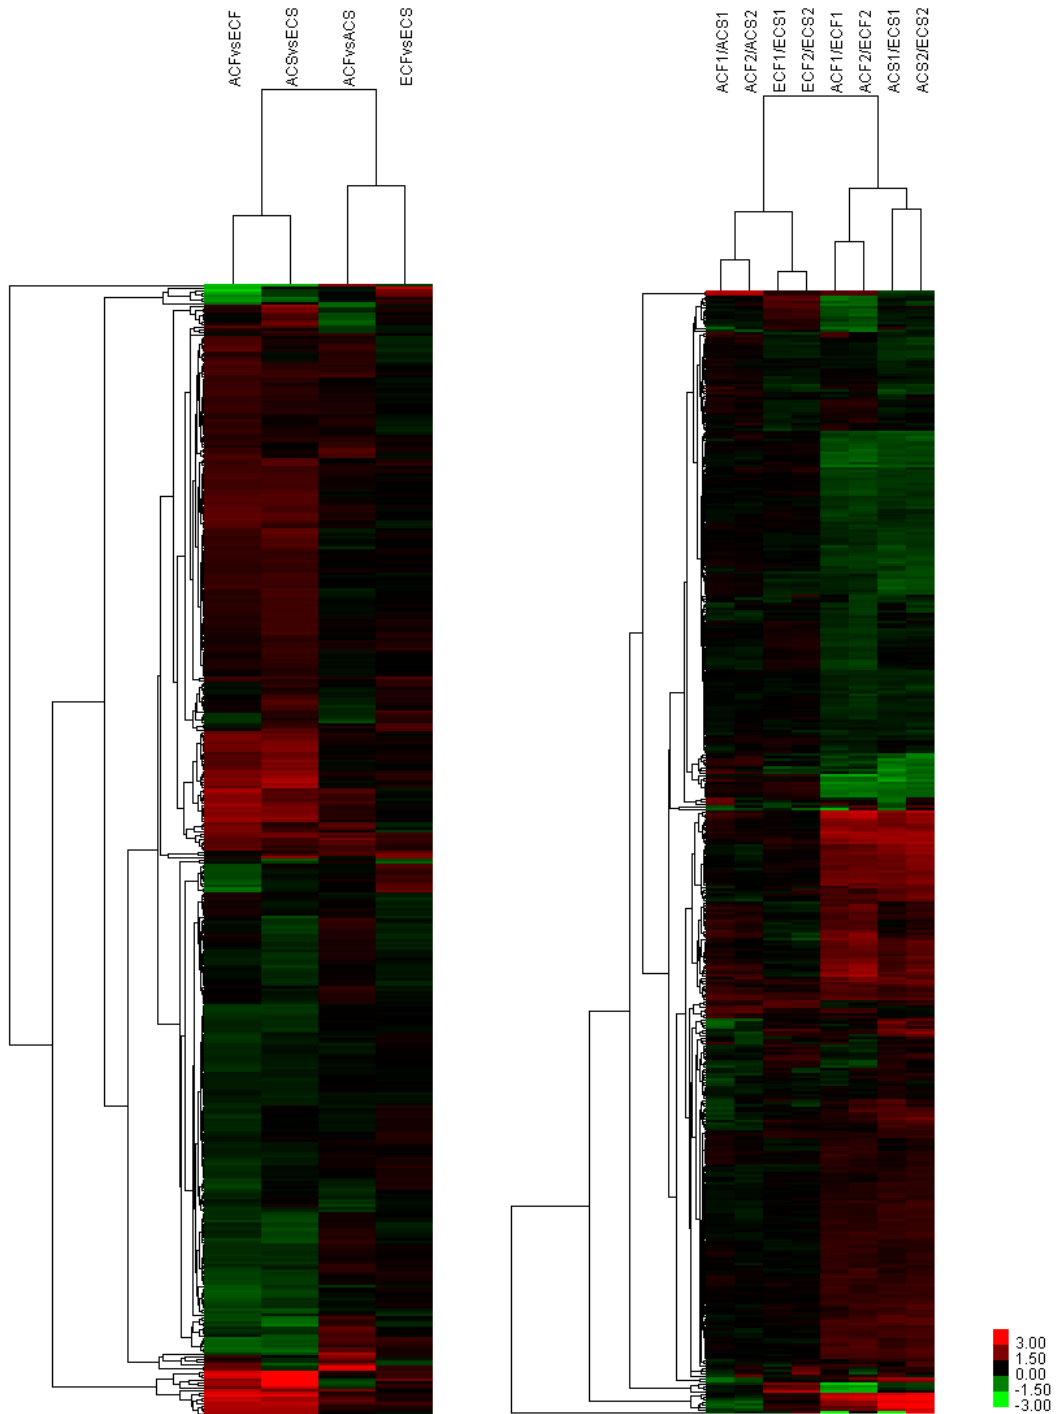

**Additional file 2: Figure S5. Heatmap of the changes in abundance of differentially expressed proteins in ACF vs ACS, ECF vs ECS, and ACS vs ECS measured by MRM and iTRAQ.**

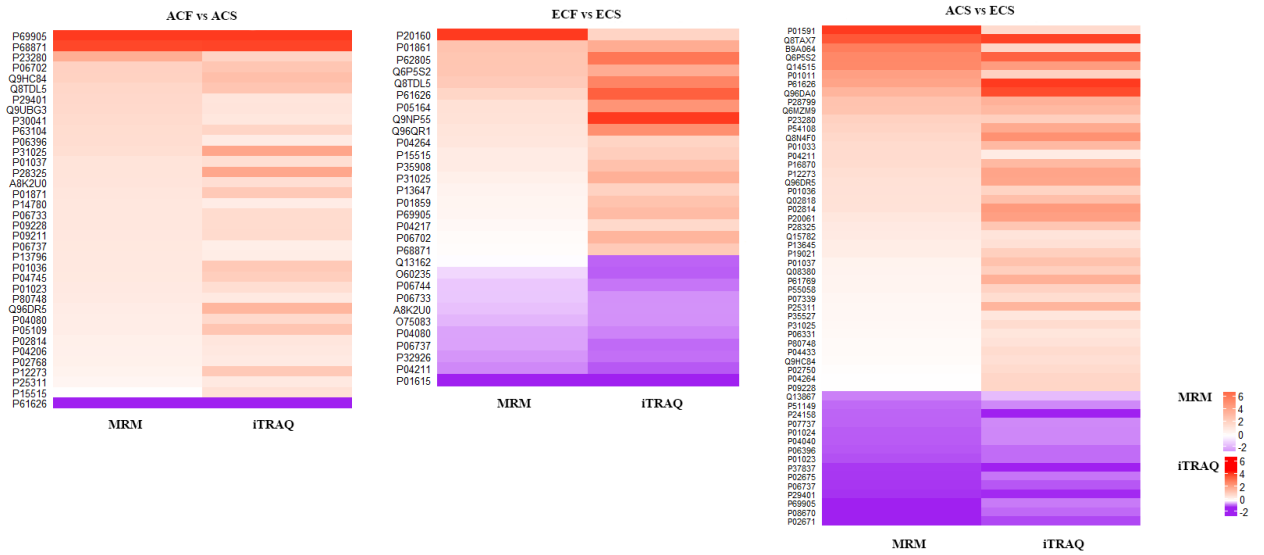

**Additional file 2: Figure S6. Heatmap of the changes in abundance of differentially expressed proteins and the proteins uniquely found in ACF vs ECF, as measured using MRM and iTRAQ.**

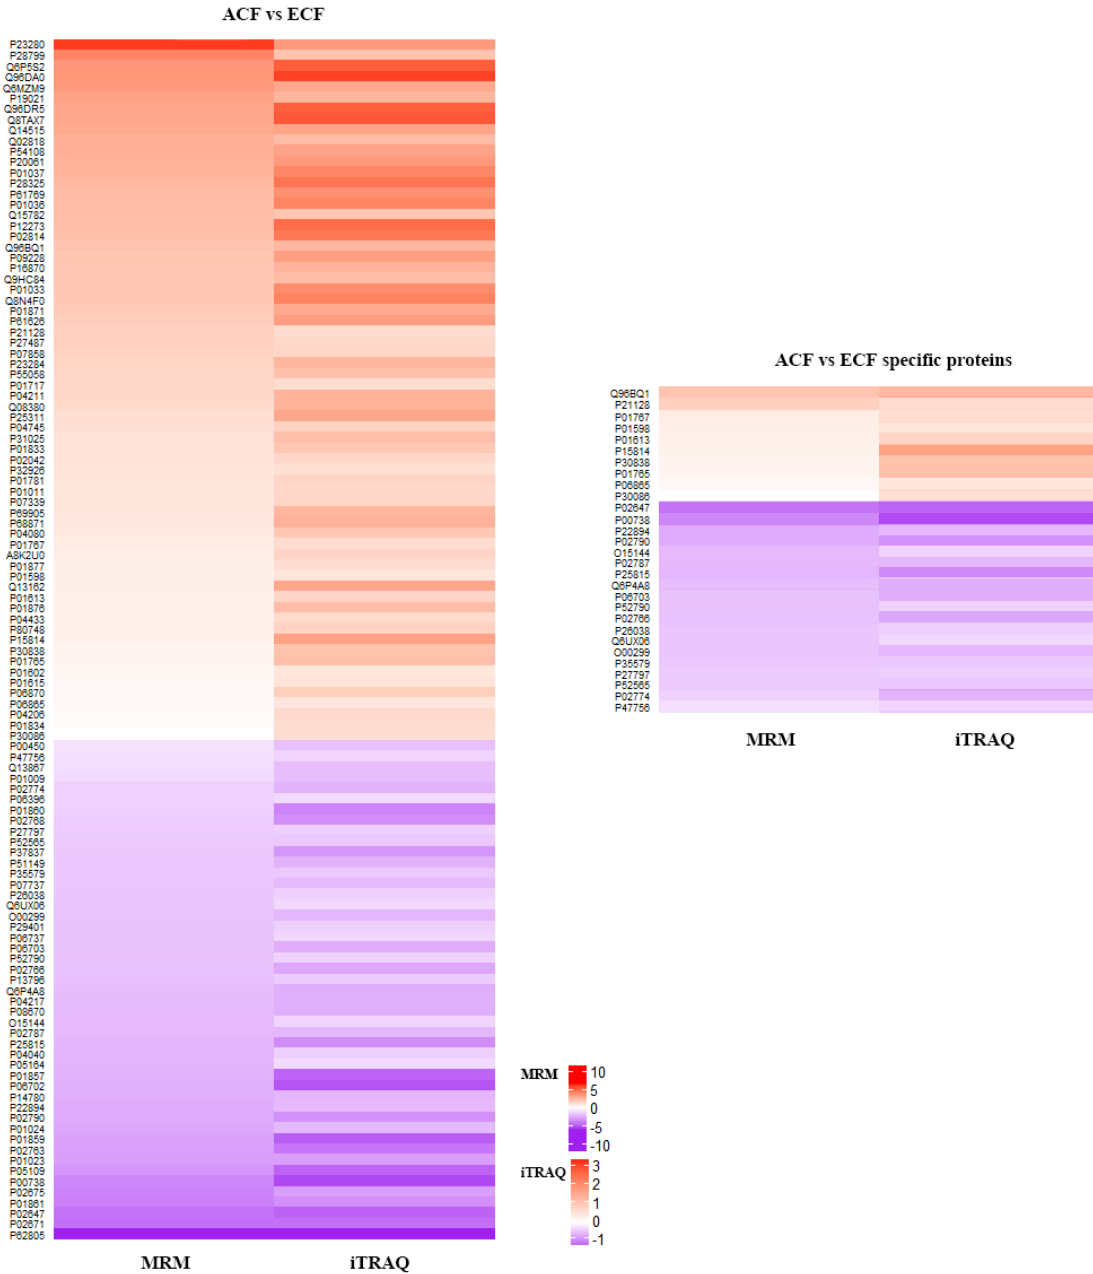

Supplement: 12967_2018_1669_MOESM2_ESM.pdf [file 12967_2018_1669_MOESM2_ESM.pdf]
